# Supplementary material
Source: PubMed Central journal article supplement (PMC5861829)
Supplement: AEM.02847-17_zam007188422s1.pdf [file AEM.02847-17_zam007188422s1.pdf]

## Supplemental Information

Table S1: Summary of Average Corrected Total Swarm Luminescence (CTSL) on Tested Media

| Strain                       | Medium** | Average CTSL |        |         |         | Calculated p-value* |      |       |      |
|------------------------------|----------|--------------|--------|---------|---------|---------------------|------|-------|------|
|                              |          | 3h           | 9h     | 15h     | 24h     | 3h                  | 9h   | 15h   | 24h  |
| <b>PAO1C/pCdrA::lux</b>      | LB       | 9067         | 41862  | 135222  | 418917  |                     |      |       |      |
|                              | TYE      | 12490        | 28543  | 192869  | 507427  | 0.16                | 0.13 | 0.008 | 0.82 |
|                              | M8       | 6452         | 67212  | 552057  | 756805  |                     |      |       |      |
|                              | FAB      | 12590        | 34033  | 63832   | 228369  |                     |      |       |      |
| <b>PAO1CΔdipA/pCdrA::lux</b> | LB       | 262871       | 500773 | 1178935 | 3011960 |                     |      |       |      |
|                              | TYE      | 366306       | 370918 | 601051  | 712256  | 0.00                | 0.00 | 0.00  | 0.03 |
|                              | M8       | 42649        | 233460 | 2055623 | 8187870 |                     |      |       |      |
|                              | FAB      | 40379        | 113304 | 177000  | 460211  |                     |      |       |      |

\*Calculated by ANOVA, alpha=0.01

\*\* LB = Difco LB Lennox; TYE = Tryptone/Yeast Extract/NaCl; M8 = M8/0.2% Glucose/0.5% casamino acids; FAB = FAB/12mM Glutamate

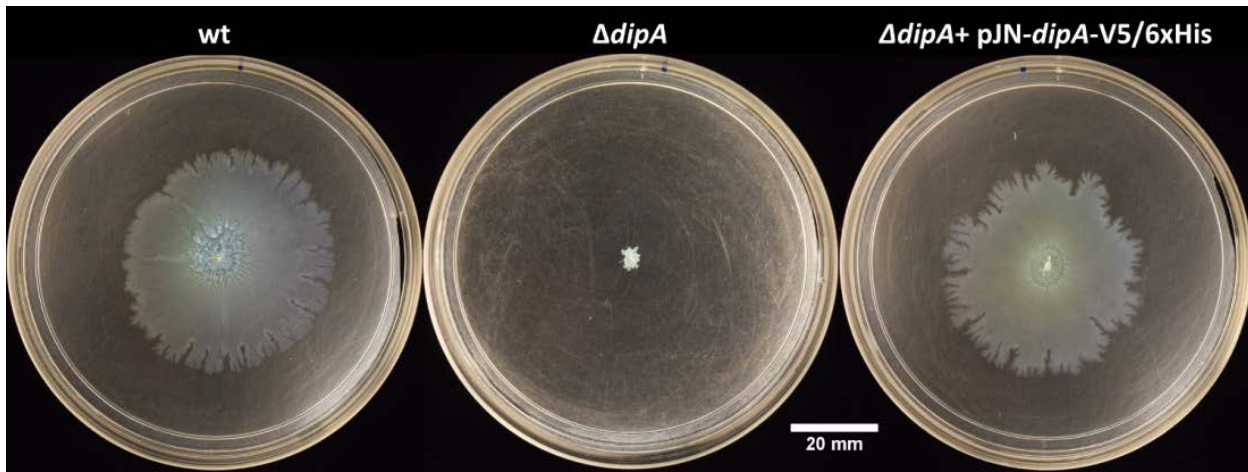

Figure S1: Restoration of swarm phenotype by complementation *in trans* of the  $\Delta dipA$  mutant. Swarming for wt,  $\Delta dipA$ , and  $\Delta dipA + pJN-dipA-V5/6xHis$  is shown when grown for 24 hours on FAB/Glutamate.

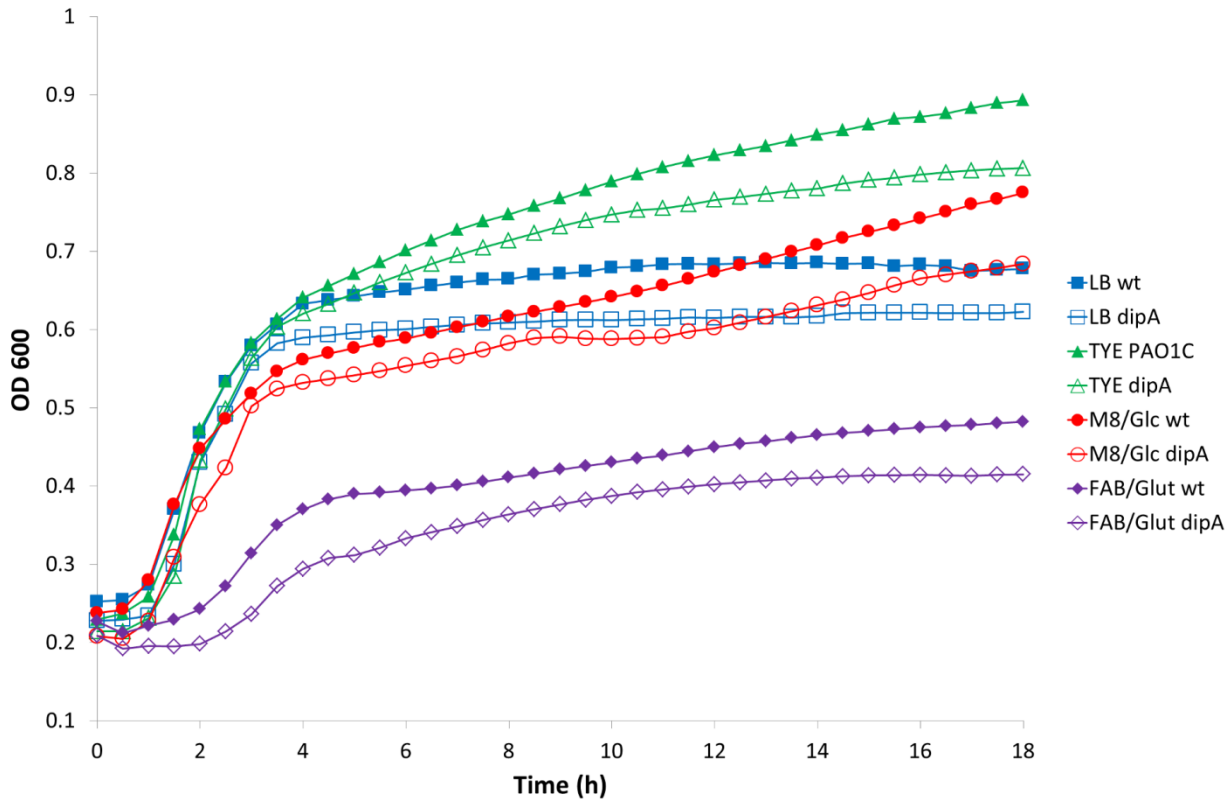

Figure S2: Planktonic growth curves of wt and  $\Delta dipA$  on select nutrient conditions. Rich media and supplemented minimal media support approximately the same growth rates in each strain. Minimal media, as expected, supports much slower growth and less overall growth. OD 600 was measured with a BioTek Powerwave x340 microplate reader. All conditions were done in quadruplicate. LB = Difco LB Lennox; TYE = Tryptone/Yeast Extract/NaCl; M8/Glc = M8/0.2% Glucose/0.5% casamino acids; FAB = FAB/12mM Glutamate

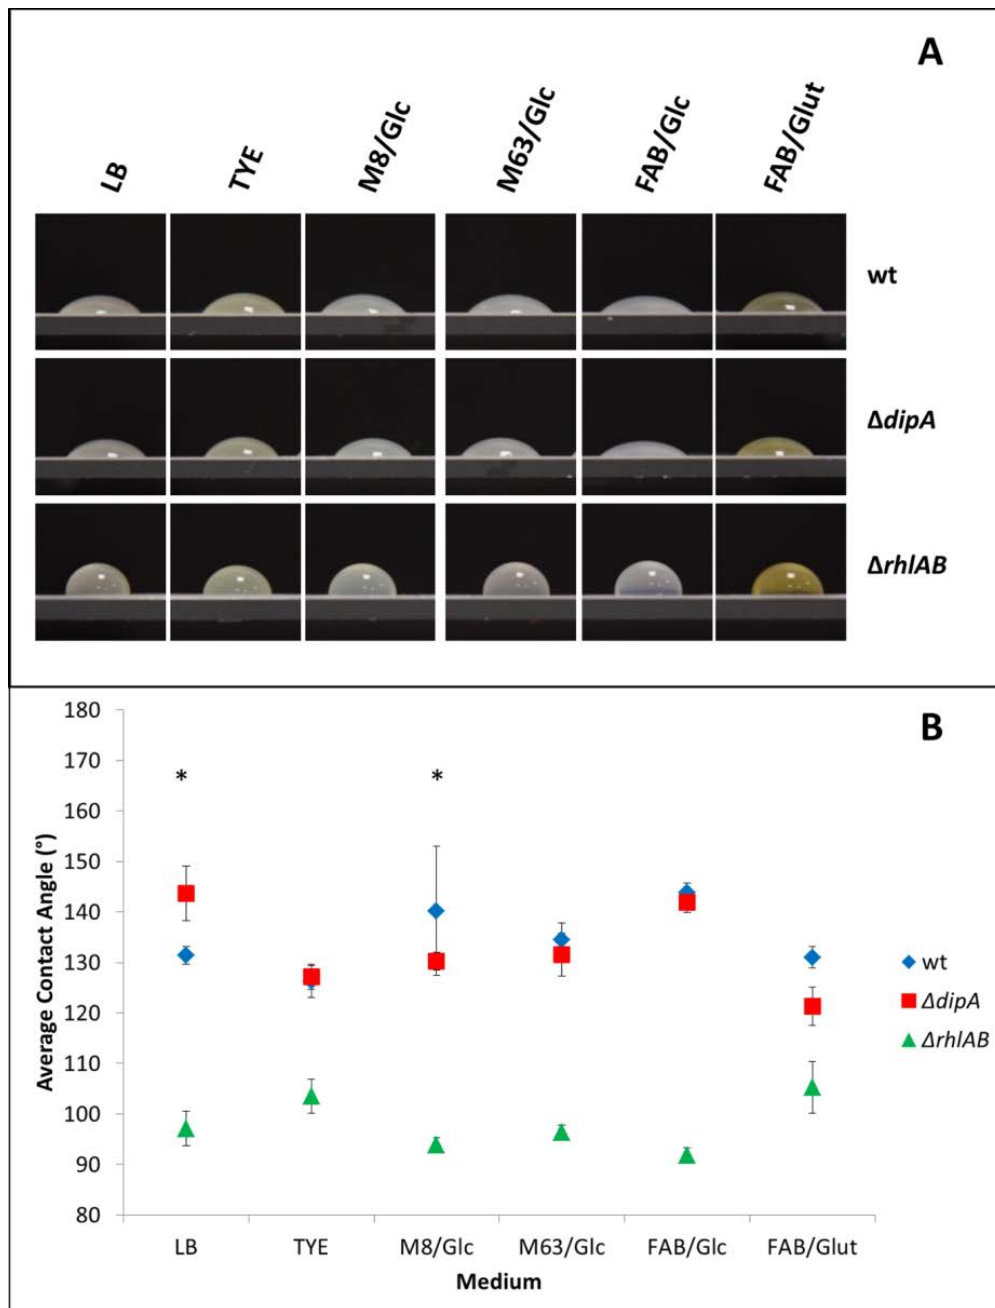

Figure S3: Drop collapse assays indicate no significant or consistent difference in surfactant production between the wt and the  $\Delta dipA$  mutant. (A) Representative images of cell suspensions on various media. A  $\Delta rhIAB$  deficient mutant is included for comparative purposes. Note that the  $\Delta rhIAB$  mutant forms round droplets that do not collapse, while the wt and  $\Delta dipA$  mutant droplets have flattened out. (B) Average contact angle, as measured with the Drop Collapse plug-in in ImageJ 1.47v, show that the  $\Delta rhIAB$  mutant droplets contact the hydrophobic surface at nearly a right angle, while the wt and  $\Delta dipA$  mutant have significantly higher contact angles. Conditions on which the  $\Delta dipA$  mutant swarms (\*) do not always correlate to a higher contact angle, indicating that swarming on these conditions is not simply due to difference in surfactant production. All drops were done in triplicate; error bars indicate standard deviation. 10 $\mu$ L of 48 hour broths were dropped on a glass slide covered in parafilm. LB = Difco LB Lennox; TYE = Tryptone/Yeast Extract/NaCl; M8/Glc = M8/0.2% Glucose/0.5% casamino acids; M63/Glc = M63/0.2% Glucose/0.5% casamino acids; FAB/Glc = FAB/12mM Glucose; FAB/Glut = FAB/12mM Glutamate

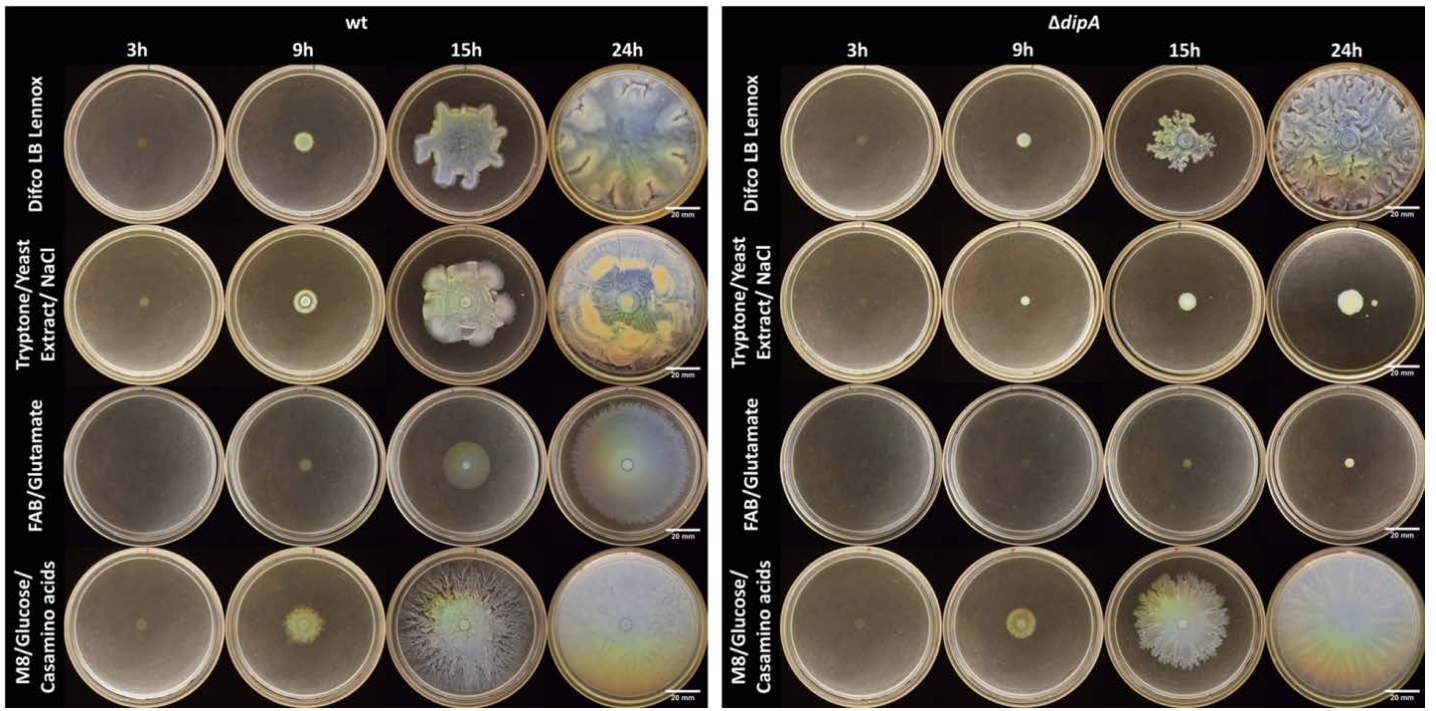

Figure S4: Representative DSLR images of swarm assays imaged for luminescence in Figure 10. Wt (left) was noticeably swarming by 9 hours for all media tested. Swarming was fastest on M8/Glucose/Casamino acids. Swarming was slowest on FAB/Glutamate. A  $\Delta dipA$  mutant (right) swarmed on Difco LB Lennox and M8/Glucose/Casamino acids. This phenotype was clearly visible by 15 hours. The  $\Delta dipA$  mutant consistently swarmed slower than its wt counterpart.
